# Supplementary material for: Protection of HT22 neuronal cells against chemically-induced ferroptosis by catechol estrogens: protein disulfide isomerase as a mechanistic target
Source: PubMed Central journal article supplement — Sci Rep. 2024 Oct 14;14:23988. doi: 10.1038/s41598-024-74742-5 (PMC11473836; doi:10.1038/s41598-024-74742-5), 2024-10-14
Supplement: 41598_2024_74742_MOESM1_ESM.pdf [file 41598_2024_74742_MOESM1_ESM.pdf]

# **Protection of HT22 Neuronal Cells Against Chemically-Induced Ferroptosis by Catechol Estrogens: Protein Disulfide Isomerase as a Mechanistic Target**

**Xuanqi Huang<sup>1</sup>, Ming-Jie Hou<sup>1</sup> and Bao Ting Zhu<sup>1,2,\*</sup>**

<sup>1</sup>Shenzhen Key Laboratory of Steroid Drug Discovery and Development, School of Medicine, The Chinese University of Hong Kong, Shenzhen 518172, China, and <sup>2</sup>Shenzhen Bay Laboratory, Shenzhen 518055, China.

**Running Title: Cytoprotective Action of Catechol Estrogens**

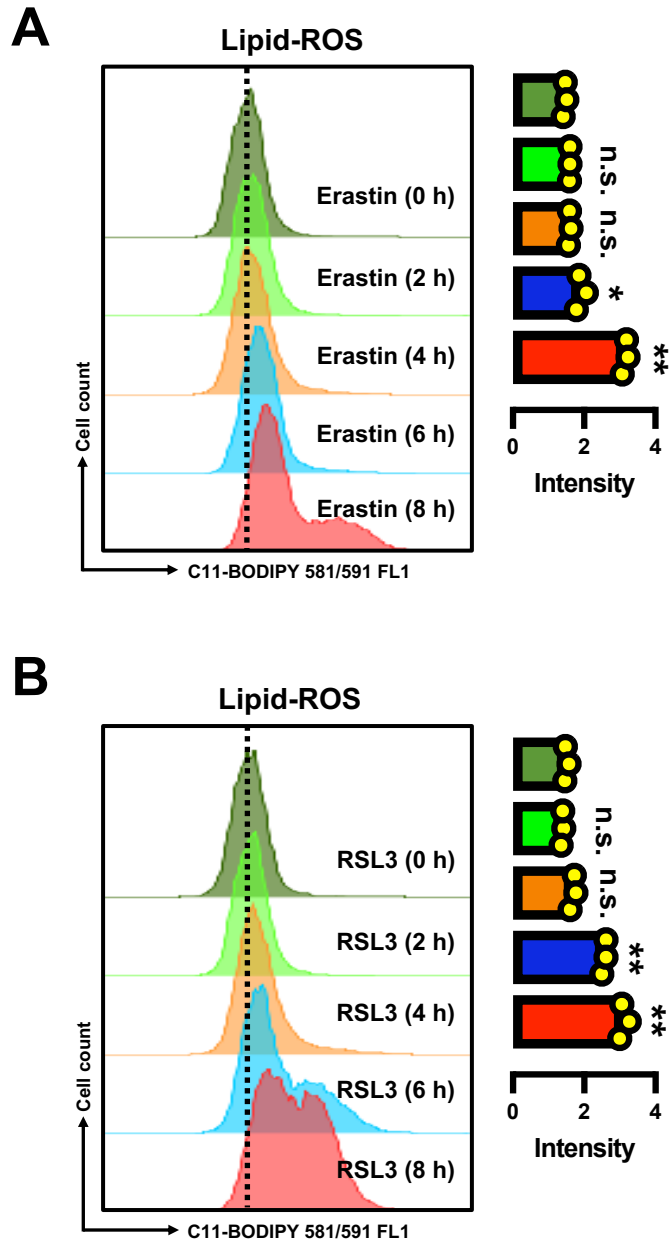

**Supplementary Fig. S1. Time-dependent accumulation of lipid-ROS following erastin and RSL3 treatment in HT22 cells.**

**A.** Time-dependent accumulation of cellular lipid-ROS after the cells were treated with 0.8  $\mu$ M erastin (flow cytometry). Each value is the mean  $\pm$  S.D. ( $n = 3$ ).

**B.** Time-dependent accumulation of cellular lipid-ROS after the cells were treated with 80 nM RSL3 (flow cytometry). Each value is the mean  $\pm$  S.D. ( $n = 3$ ).

## Supplementary Figure S2

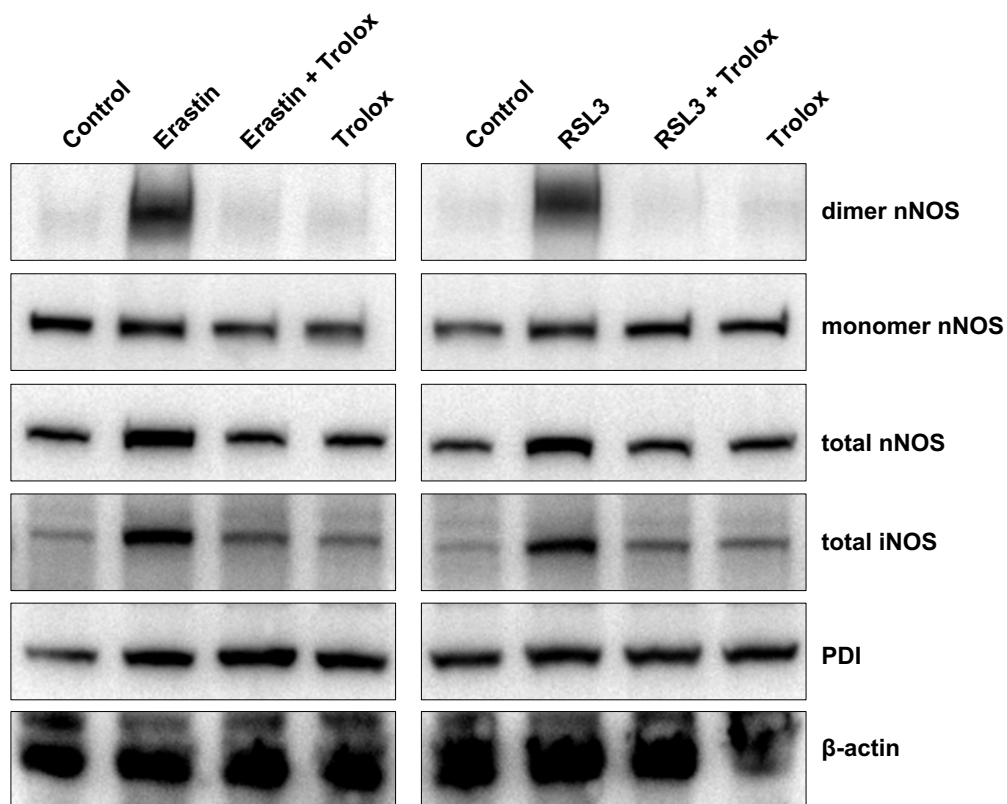

**Supplementary Fig. S2. Effect of Trolox on cellular total nNOS and iNOS levels and on nNOS dimerization in HT22 cells treated with erastin or RSL3.**

Cells were treated with erastin ( $0.8 \mu\text{M}$ )  $\pm$  Trolox ( $100 \mu\text{M}$ ) for 8 h or RSL3 ( $0.08 \mu\text{M}$ )  $\pm$  Trolox ( $100 \mu\text{M}$ ) for 6 h. Proteins were separated using 10% agarose gel (for analysis of total NOS protein) or 6% agarose gel (for analysis of monomeric and dimeric NOS proteins). The corresponding unprocessed Western blot images are shown in **Supplementary Fig. S3**.

Supplementary Figure S3

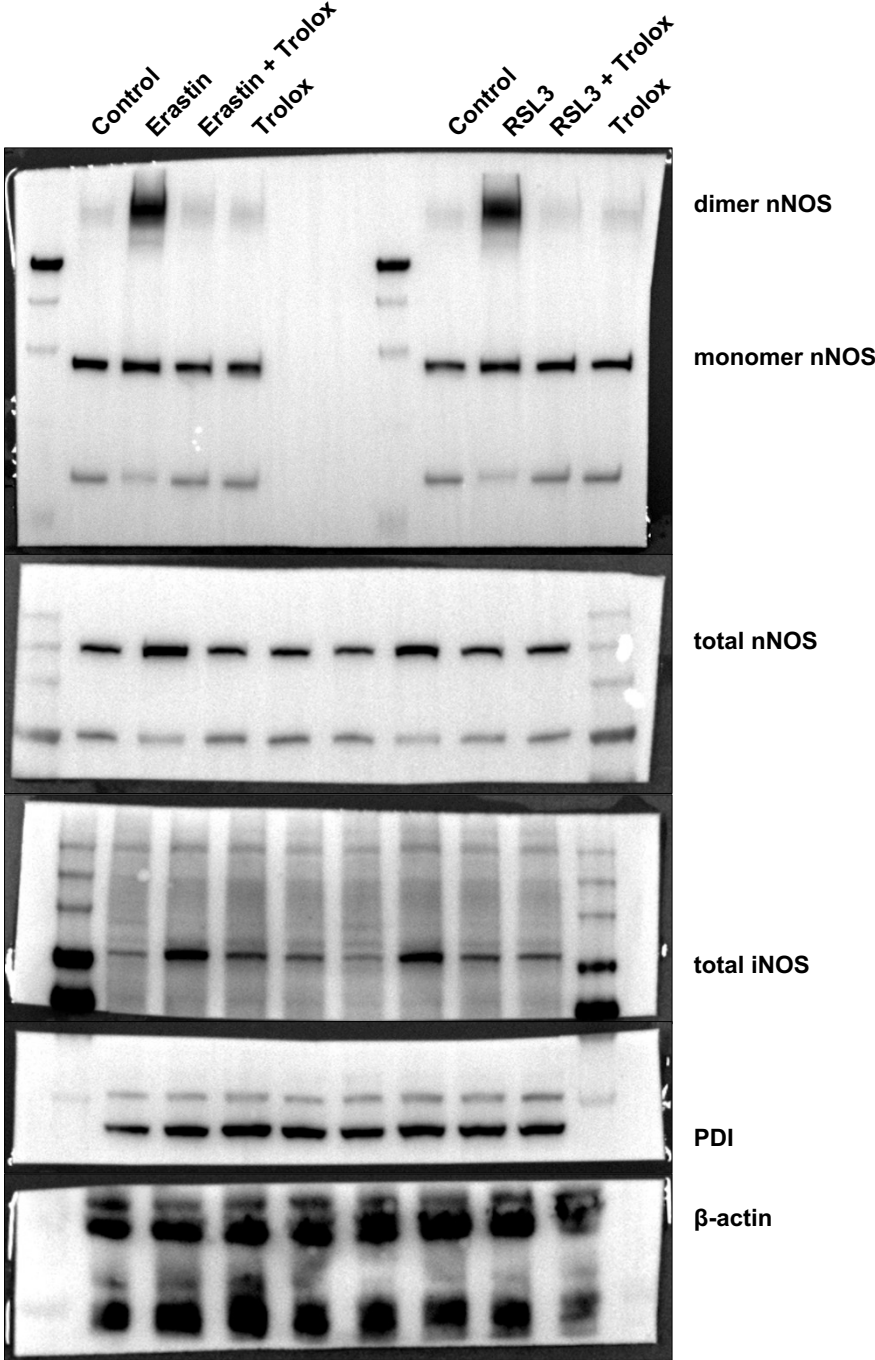

**Supplementary Fig. S3.** Corresponding unprocessed Western blot images for the data shown in Supplementary Fig. S2.

Supplementary Figure S4

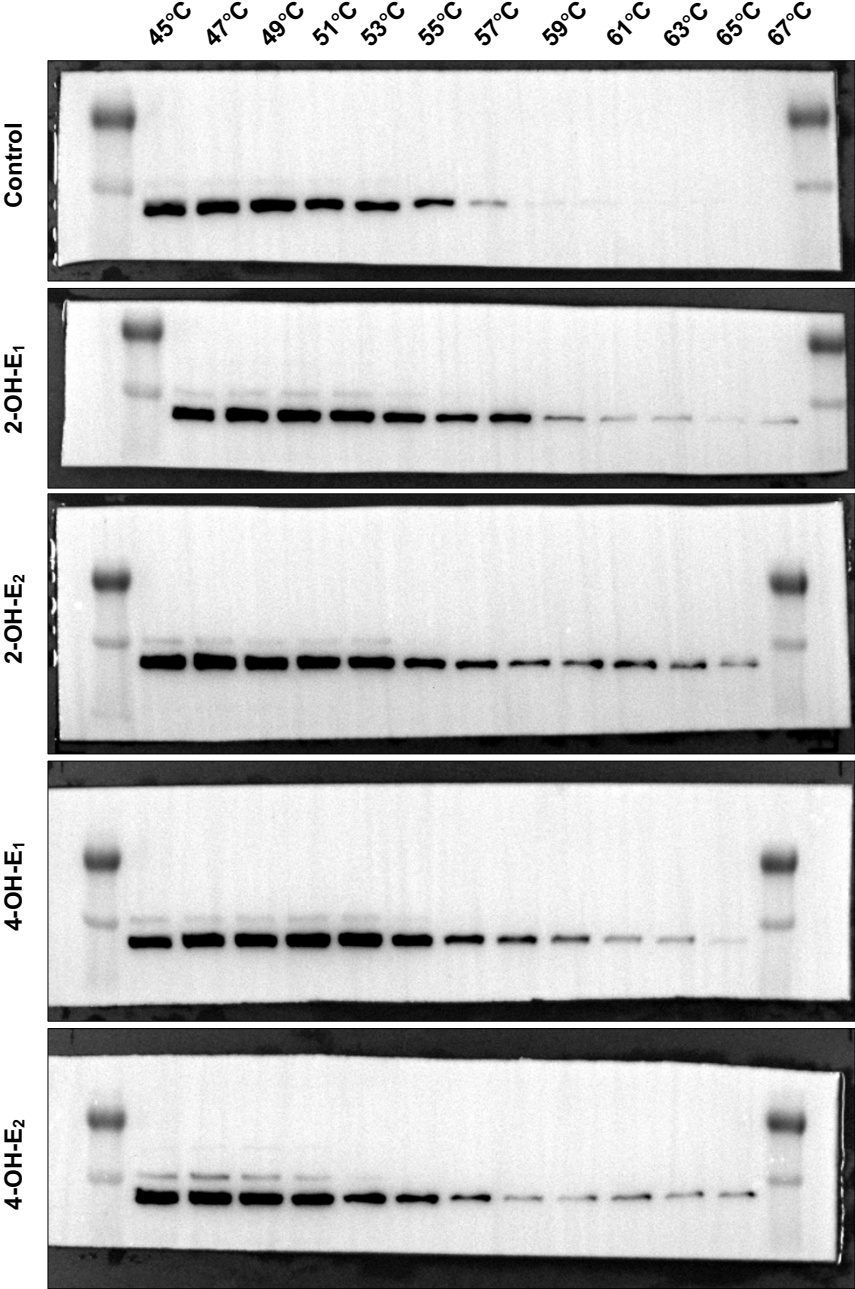

**Supplementary Fig. S4.** Corresponding unprocessed Western blot images for Fig. 8A.

Supplementary Figure S5

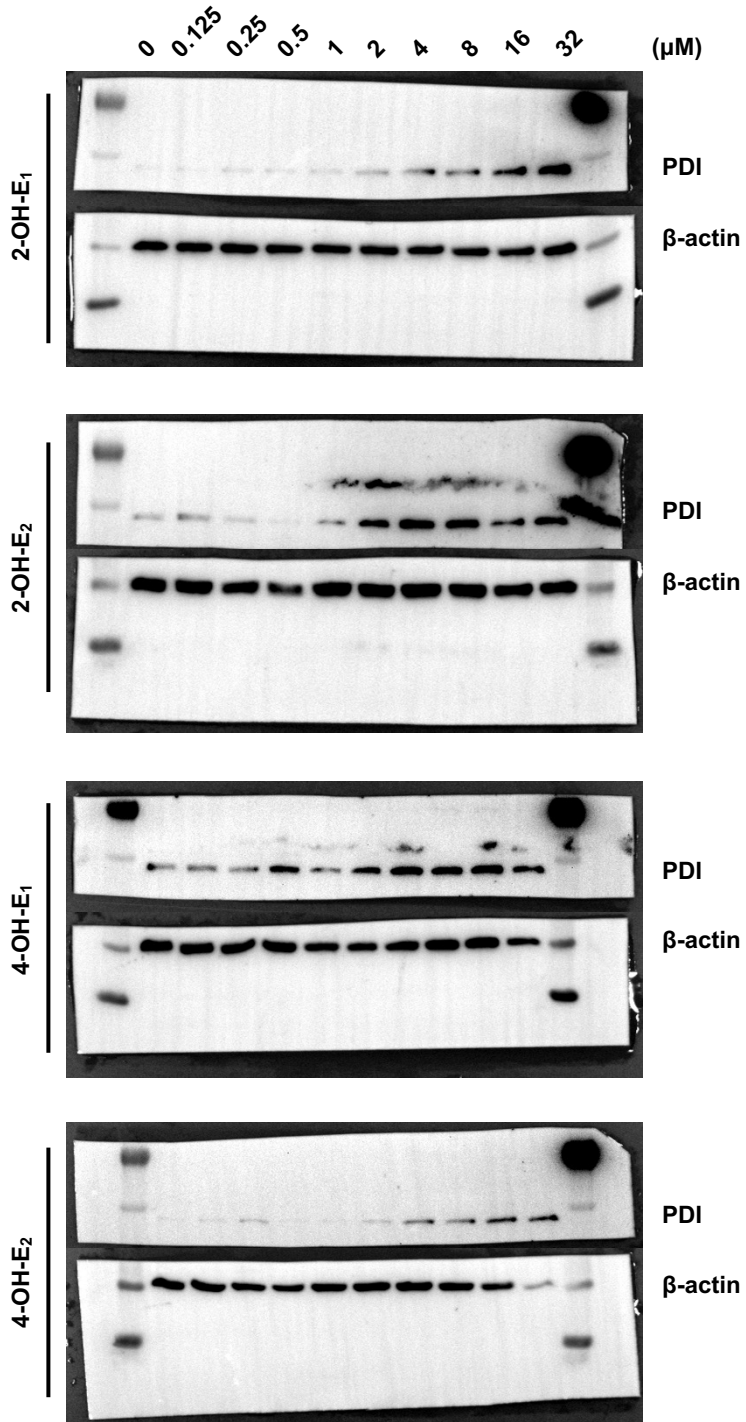

Supplementary Fig. S5. Corresponding unprocessed Western blot images for Fig. 9A.

Supplementary Figure S6

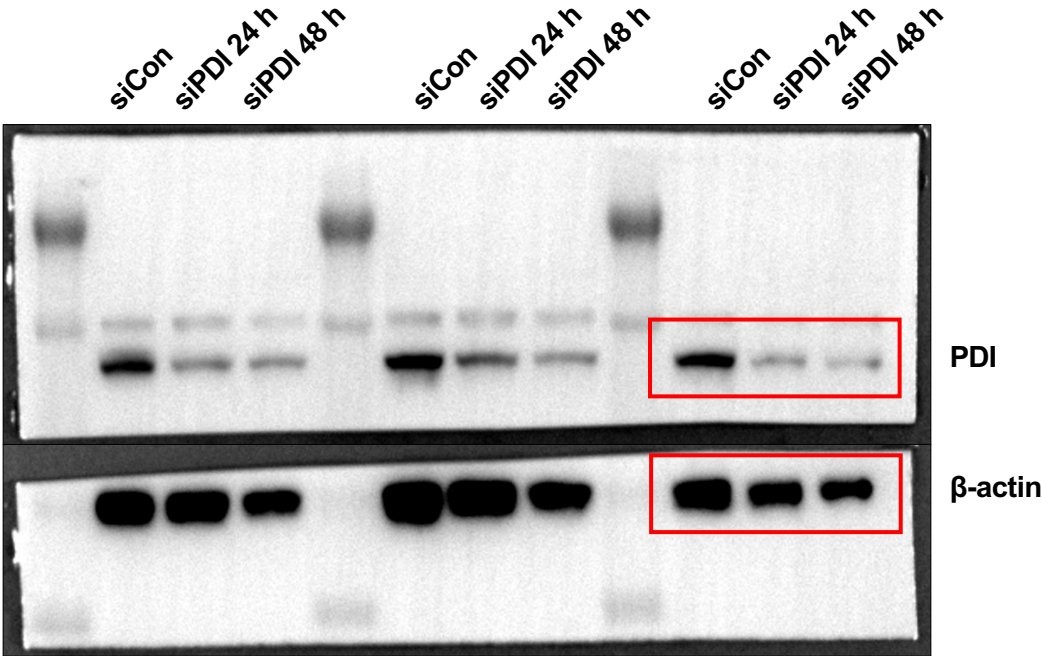

**Supplementary Fig. S6. Corresponding unprocessed Western blot images for Fig 10A.**  
Note that the bands highlighted in the red boxes were cut and used in Fig. 10A.

## Supplementary Figure S7

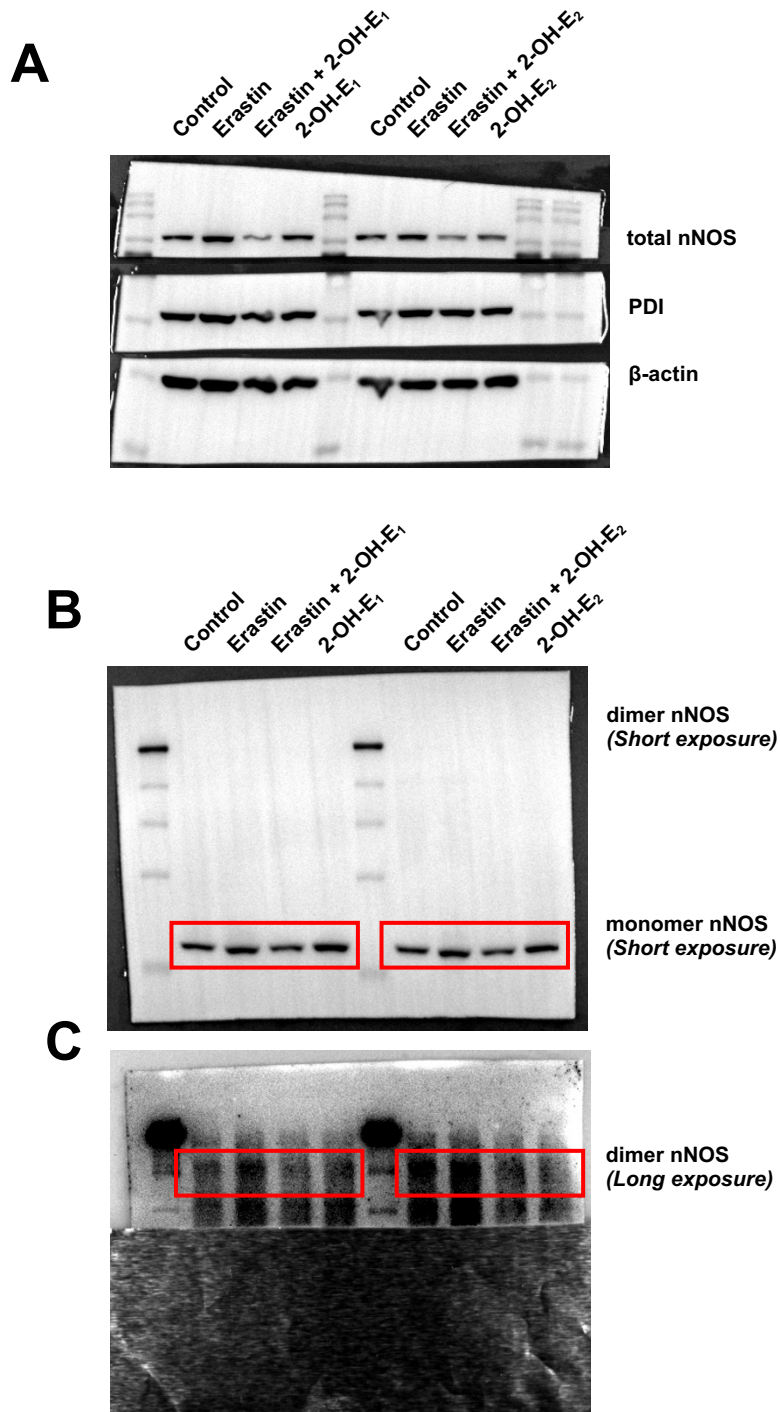

**Supplementary Fig. S7.** Corresponding unprocessed Western blot images for the data shown in Fig. 11A, 11B.

A. Unprocessed blots for total nNOS, PDI and  $\beta$ -actin as shown in Fig. 11A, 11B.

B. Unprocessed blots for nNOS monomer (the red boxes represent the nNOS monomer shown in Fig. 11A, 11B).

C. Unprocessed blots for nNOS dimer (the red boxes represent the nNOS dimer shown in Fig. 11A, 11B).



## Supplementary Figure S8

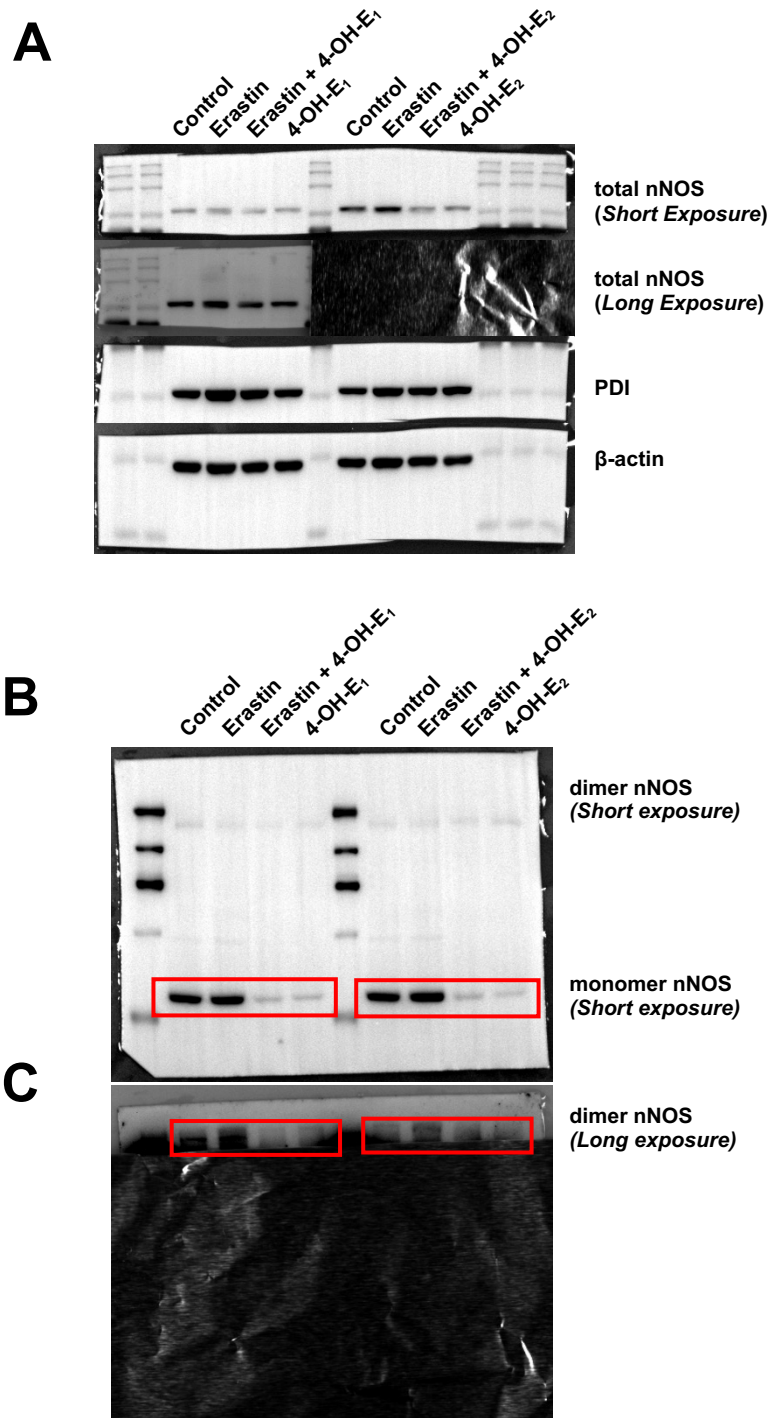

**Supplementary Fig. S8.** Corresponding unprocessed Western blot images for the data shown in Fig. 11C, 11D.

A. Unprocessed blots for total nNOS, PDI and  $\beta$ -actin as shown in Fig. 11C, 11D.

B. Unprocessed blots for nNOS monomer (the red boxes represent the nNOS monomer shown in Fig. 11C, 11D).

C. Unprocessed blots for nNOS dimer (the red boxes represent the nNOS dimer shown in Fig. 11C, 11D).

## Supplementary Figure S9

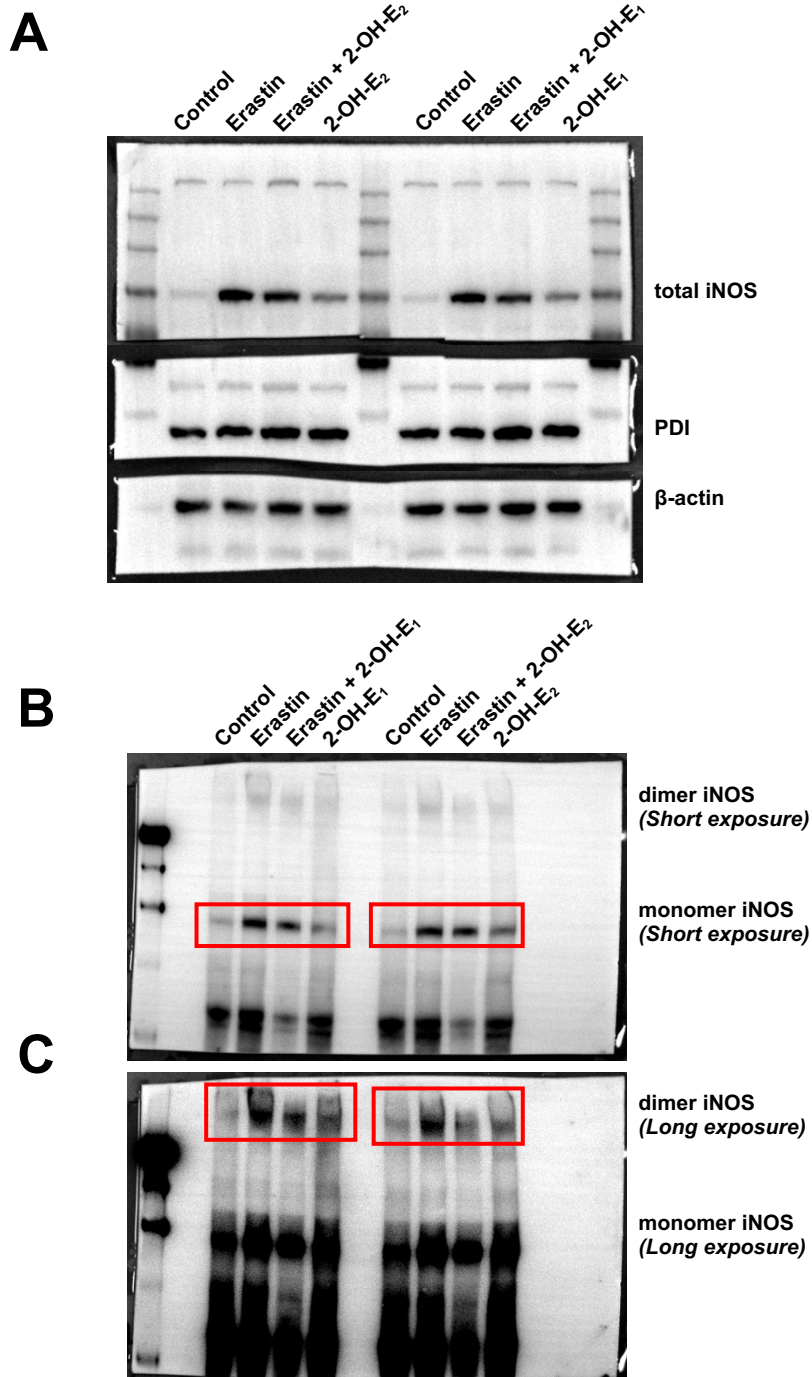

**Supplementary Fig. S9. Corresponding unprocessed Western blot images for the data shown in Fig 11E, 11F.**

A. Unprocessed blots for total iNOS, PDI and  $\beta$ -actin as shown in **Fig. 11E, 11F**.

B. Unprocessed blots for iNOS monomer (the red boxes represent the iNOS monomer shown in **Fig. 11E, 11F**).

C. Unprocessed blots for iNOS dimer (the red boxes represent the iNOS dimer shown in **Fig. 11E, 11F**).

## Supplementary Figure S10

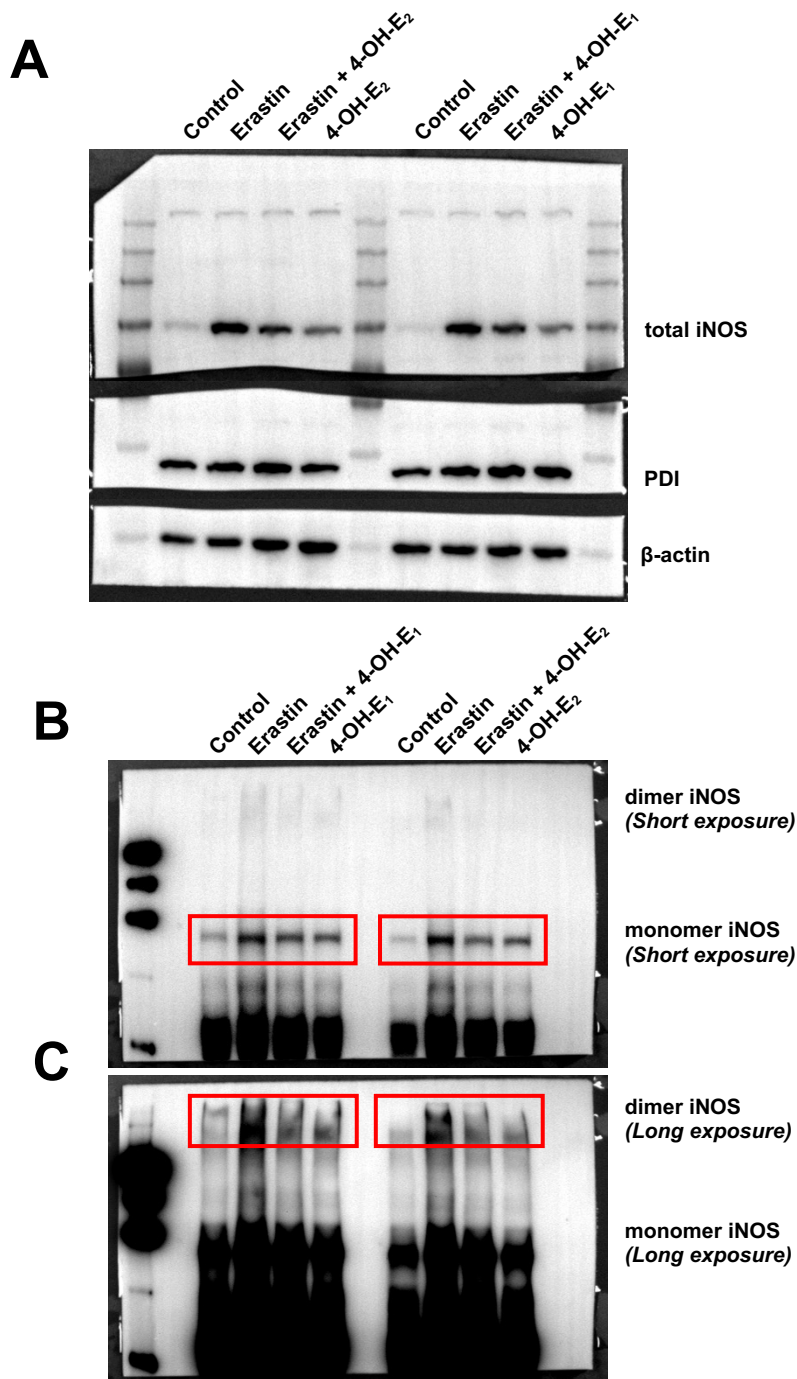

**Supplementary Fig. S10.** Corresponding unprocessed Western blot images for the data shown in Fig 11G, 11H.

A. Unprocessed blots for total iNOS, PDI and  $\beta$ -actin as shown in Fig. 11G, 11H.

B. Unprocessed blots for iNOS monomer (the red boxes represent the iNOS monomer shown in Fig. 11G, 11H).

C. Unprocessed blots for iNOS dimer (the red boxes represent the iNOS dimer shown in Fig. 11G, 11H).

## Supplementary Figure S11

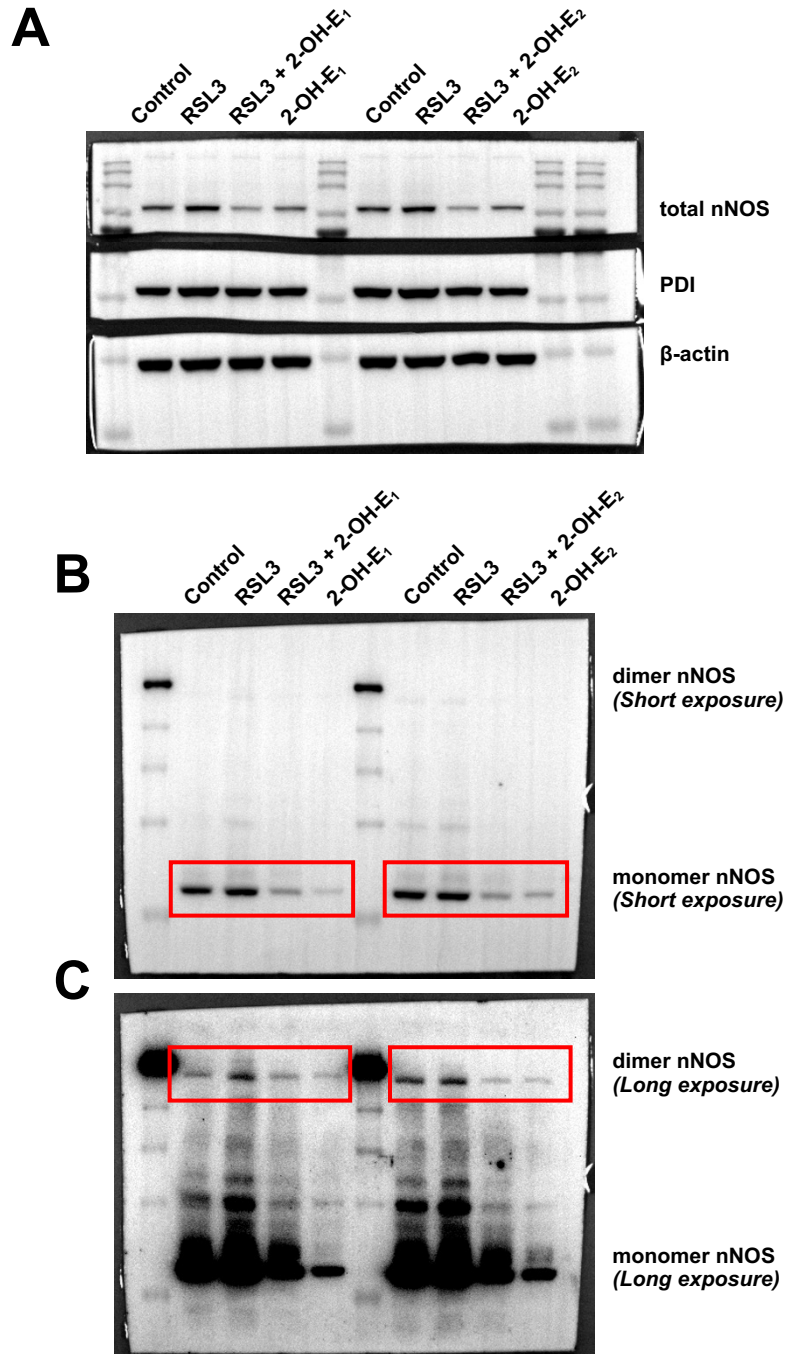

**Supplementary Fig. S11.** Corresponding unprocessed Western blot images for the data shown in Fig. 11I, 11J.

A. Unprocessed blots for total nNOS, PDI and  $\beta$ -actin as shown in Fig. 11I, 11J.

B. Unprocessed blots for nNOS monomer (the red boxes represent the nNOS monomer shown in Fig. 11I, 11J).

C. Unprocessed blots for nNOS dimer (the red boxes represent the nNOS dimer shown in Fig. 11I, 11J).

## Supplementary Figure S12

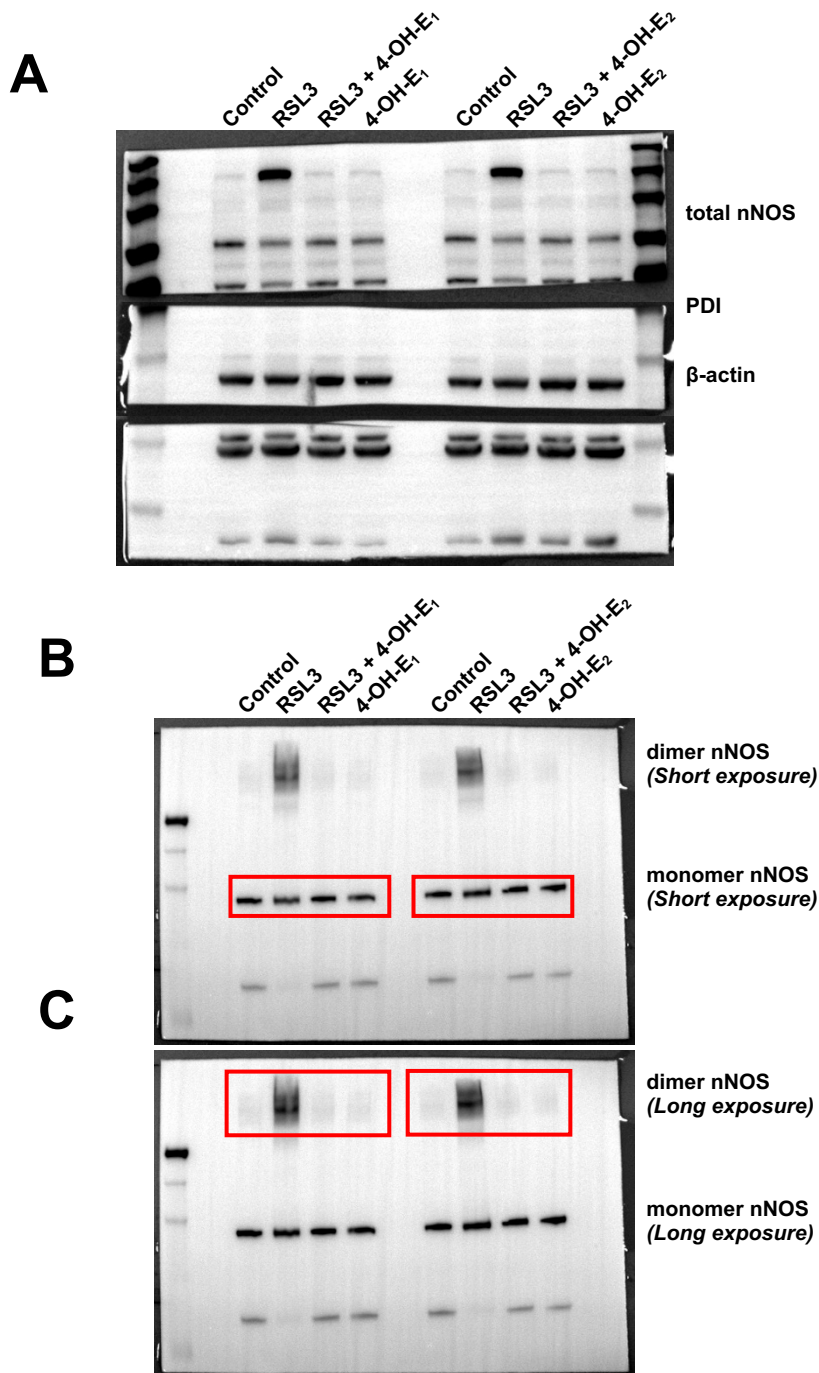

**Supplementary Fig. S12.** Corresponding unprocessed Western blot images for the data shown in Fig 11K, 11L.

A. Unprocessed blots for total nNOS, PDI and β-actin as shown in Fig. 11K, 11L.

B. Unprocessed blots for nNOS monomer (the red boxes represent the nNOS monomer shown in Fig. 11K, 11L).

C. Unprocessed blots for nNOS dimer (the red boxes represent the nNOS dimer shown in Fig. 11K, 11L).

Supplementary Figure S13

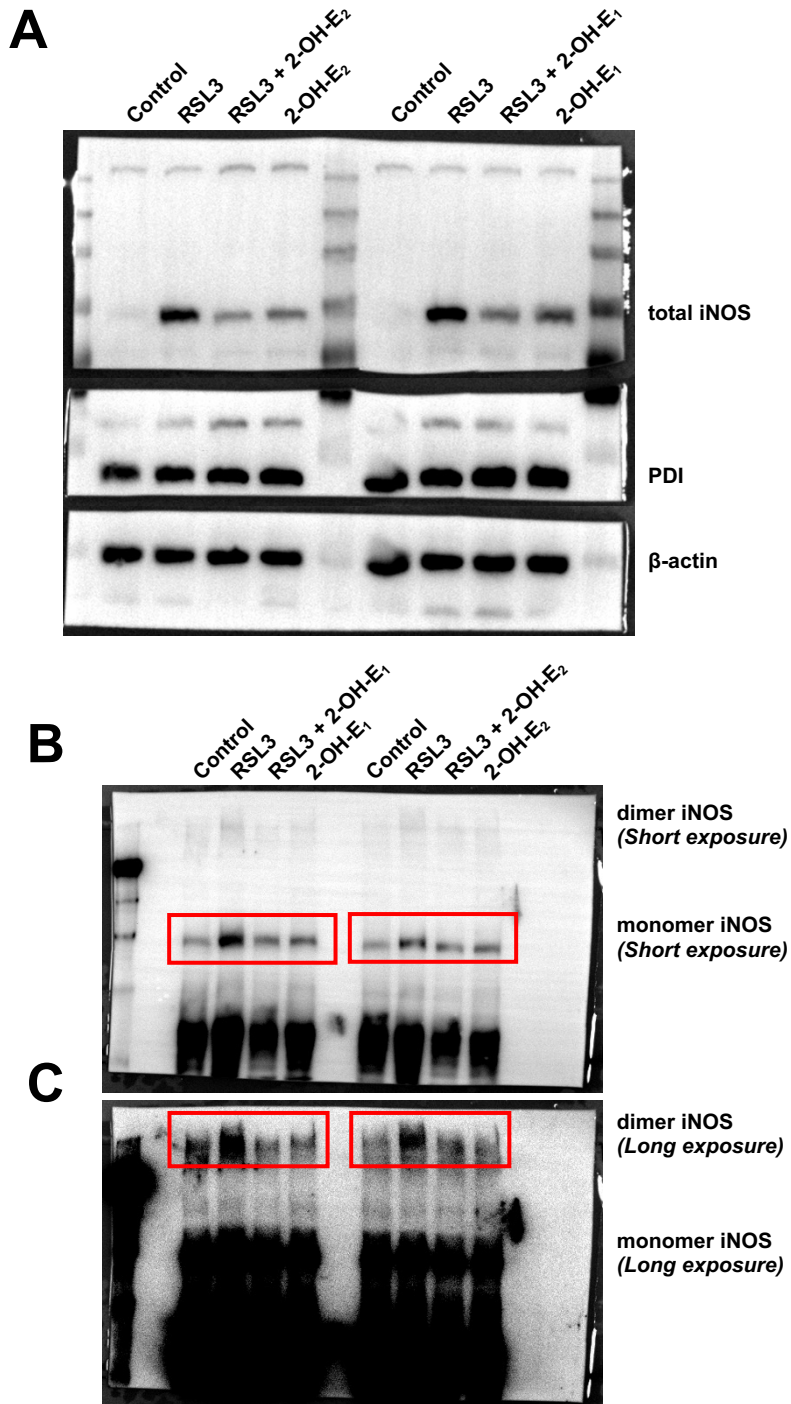

**Supplementary Fig. S13.** Corresponding unprocessed Western blot images for the data shown in Fig. 11M, 11N.

A. Unprocessed blots for total iNOS, PDI and  $\beta$ -actin as shown in Fig. 11M, 11N.

B. Unprocessed blots for iNOS monomer (the red boxes represent the iNOS monomer shown in Fig. 11M, 11N).

C. Unprocessed blots for iNOS dimer (the red boxes represent the iNOS dimer shown in Fig. 11M, 11N).

Supplementary Figure S14

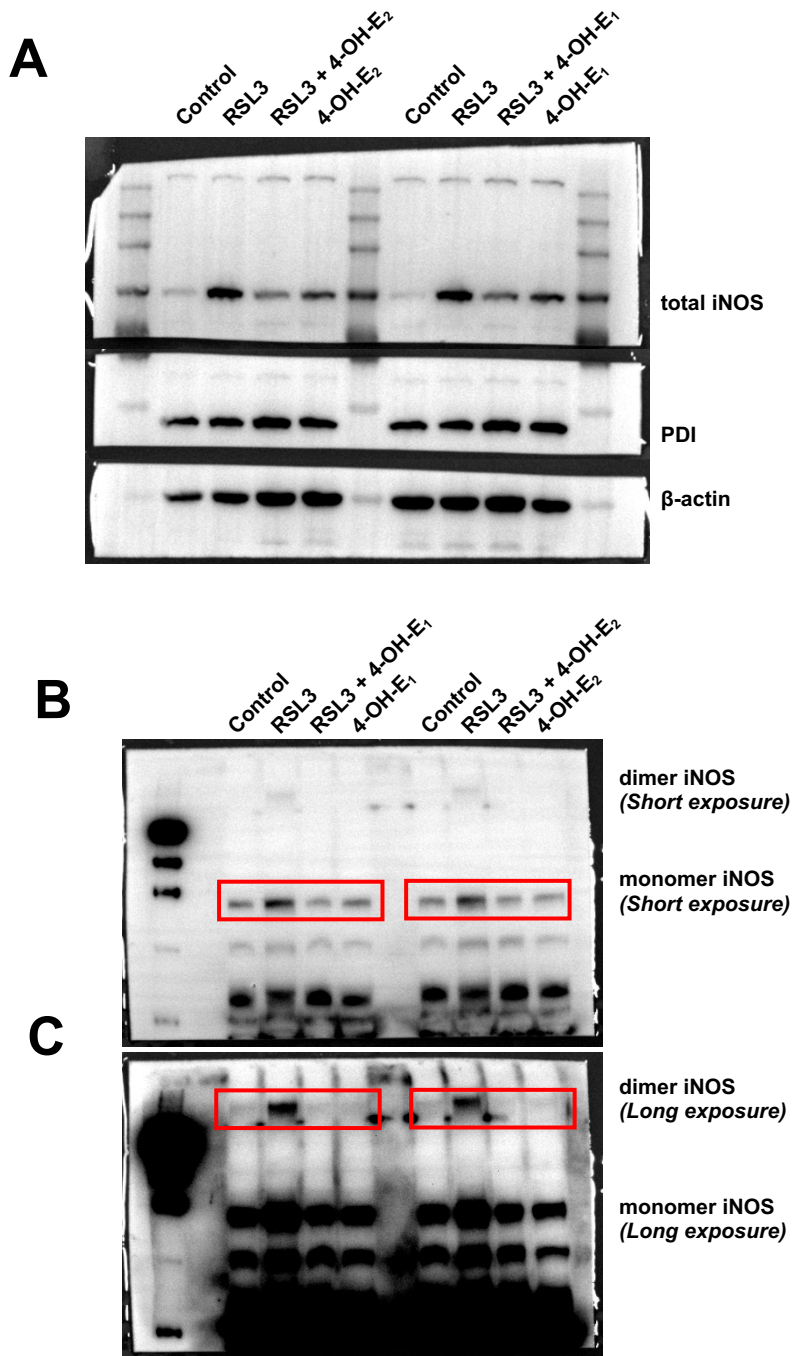

**Supplementary Fig. S14.** Corresponding unprocessed Western blot images for the data shown in Fig. 11O, 11P.

A. Unprocessed blots for total iNOS, PDI and  $\beta$ -actin as shown in Fig. 11O, 11P.

B. Unprocessed blots for iNOS monomer (the red boxes represent the iNOS monomer shown in Fig. 11O, 11P).

C. Unprocessed blots for iNOS dimer (the red boxes represent the iNOS dimer shown in Fig. 11O, 11P).
